# Supplementary material
Source: PubMed Central journal article supplement (PMC4376255)

**Analytical and Bioanalytical Chemistry**

**Electronic Supplementary Material**

**Measurement of bisphenol A, bisphenol A  $\beta$ -D-glucuronide, genistein, and genistein 4'- $\beta$ -D-glucuronide via SPE and HPLC-MS/MS**

Janis L. Coughlin, Bozena Winnik, and Brian Buckley

**Figure S1:** BPA calibration curve. (Y-axis: integrated area)

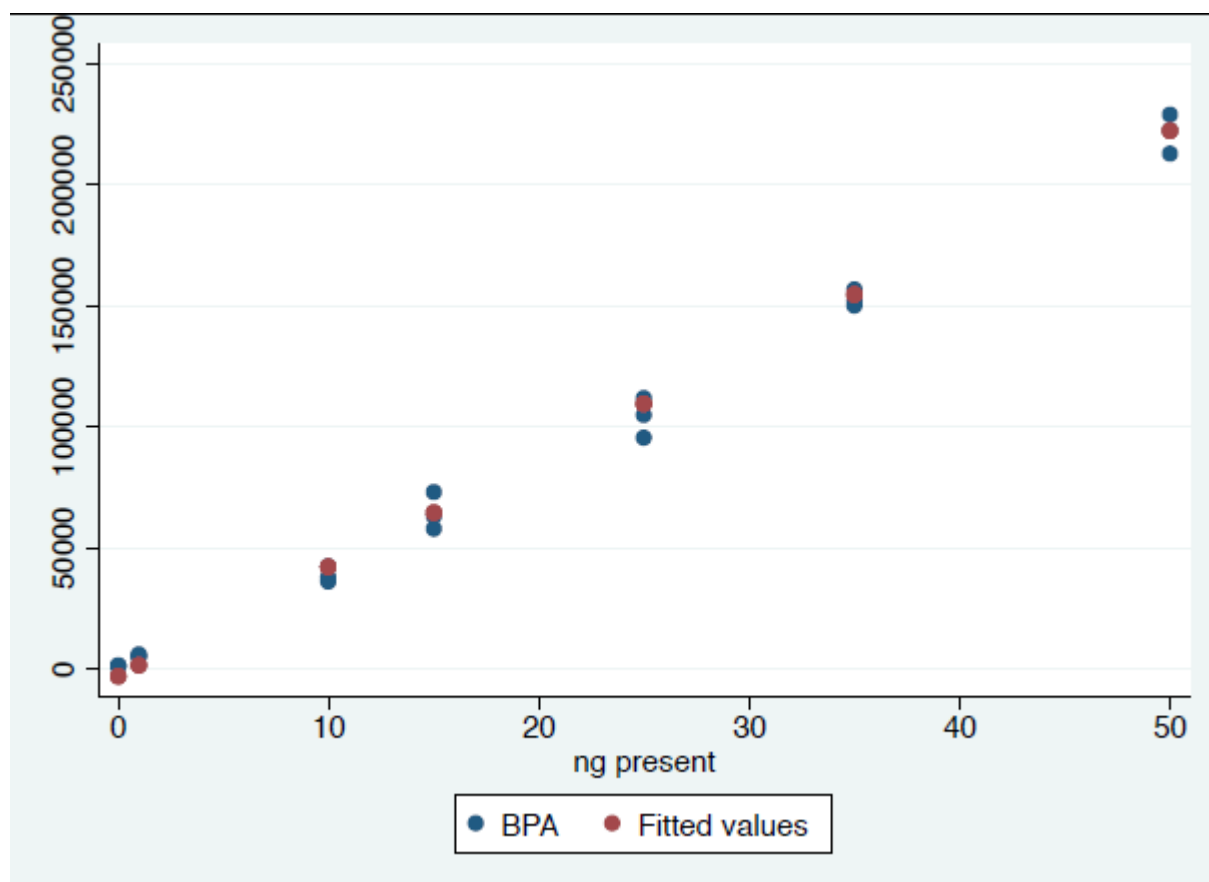

**Figure S2:** BPA glucuronide calibration curve. (Y-axis: integrated area)

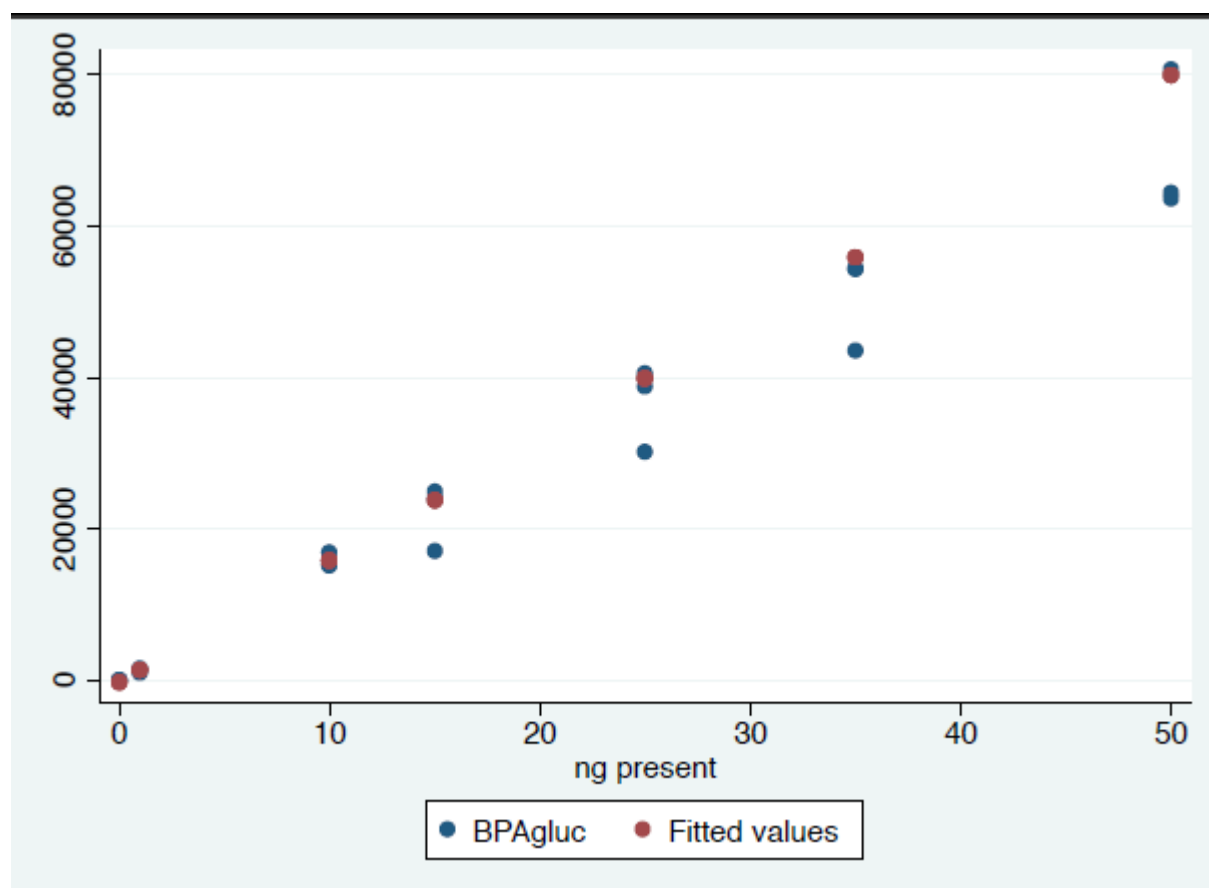

**Figure S3:** Genistein calibration curve. (Y-axis: integrated area)

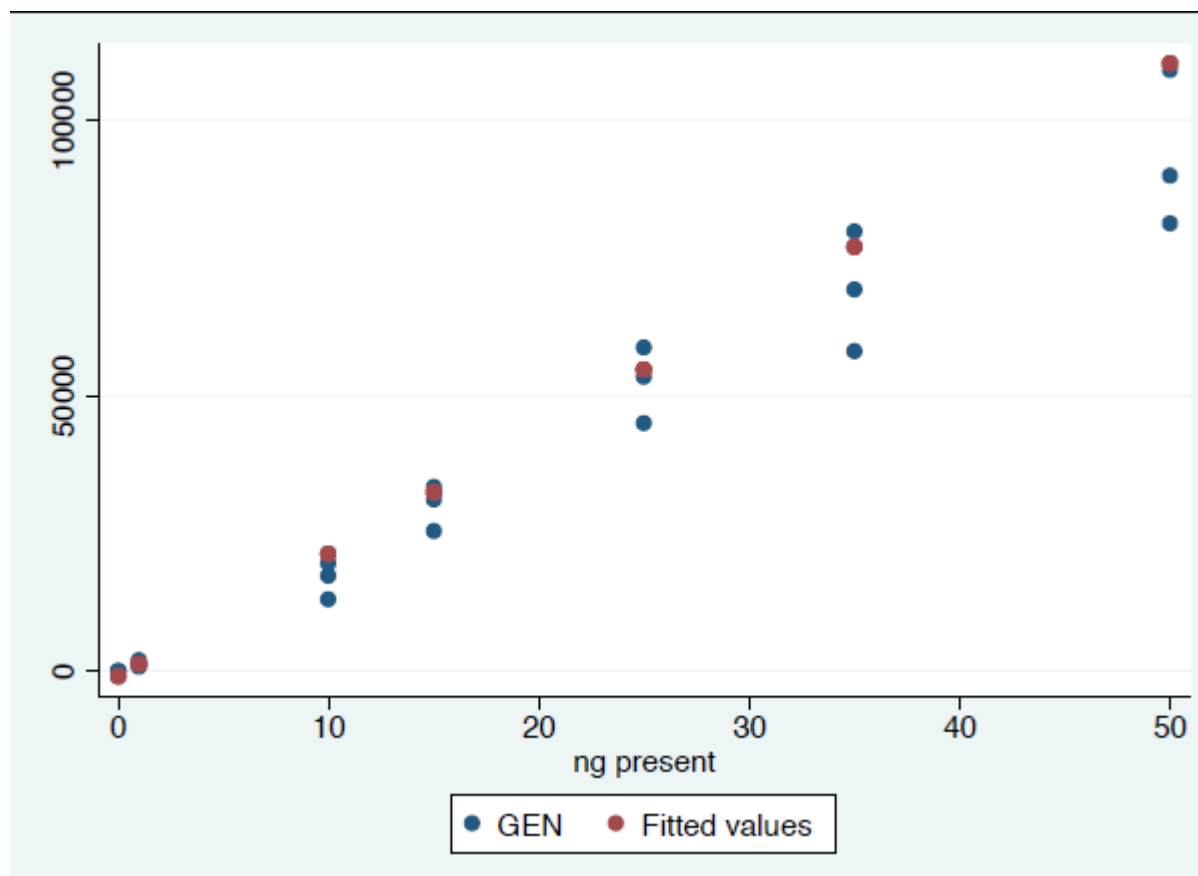

**Figure S4:** Genistein glucuronide calibration curve. (Y-axis: integrated area)

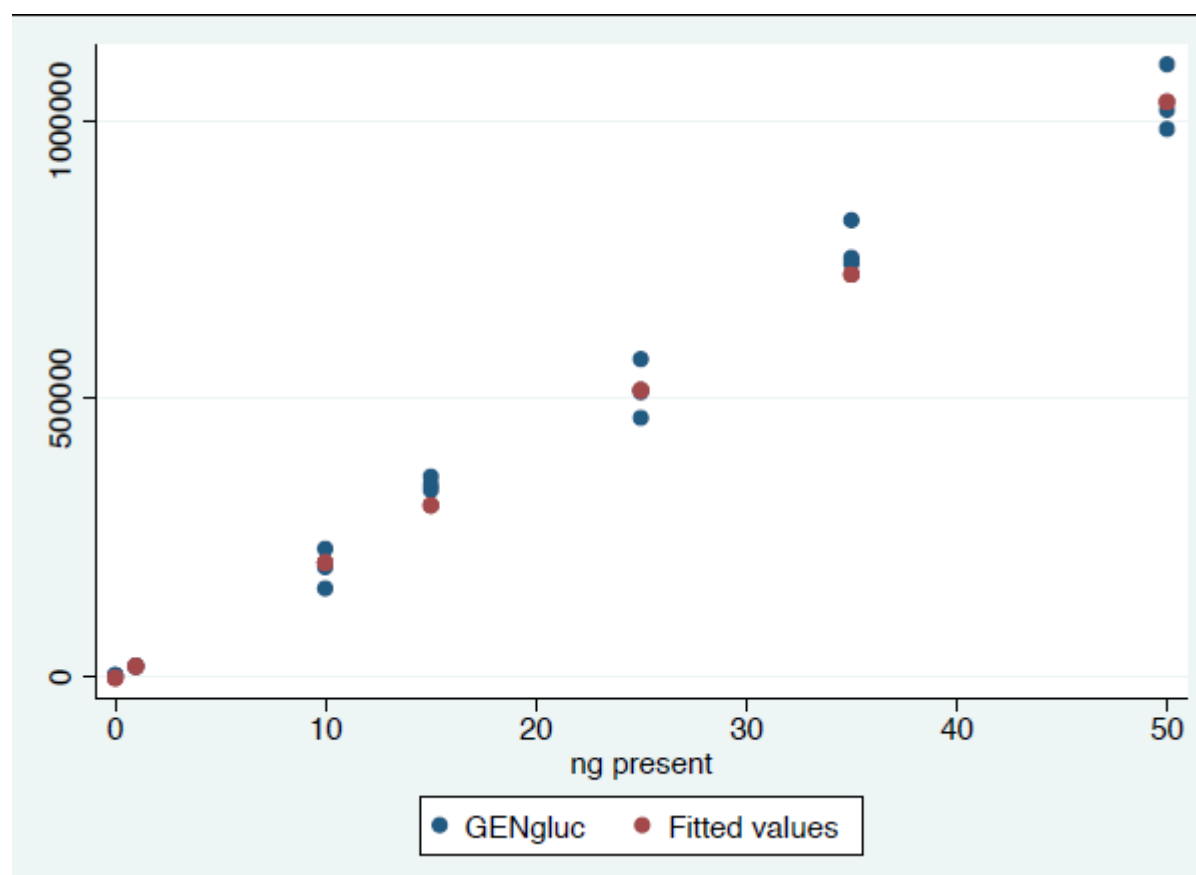

Supplement: NIHMS304711-supplement-1.pdf [file NIHMS304711-supplement-1.pdf]
